# Supplementary material
Source: Springer Nature journal article supplement (https://www.springermedizin.de/resource/supplementary/12960_2012_329_MOESM1_ESM.pdf/9569998)

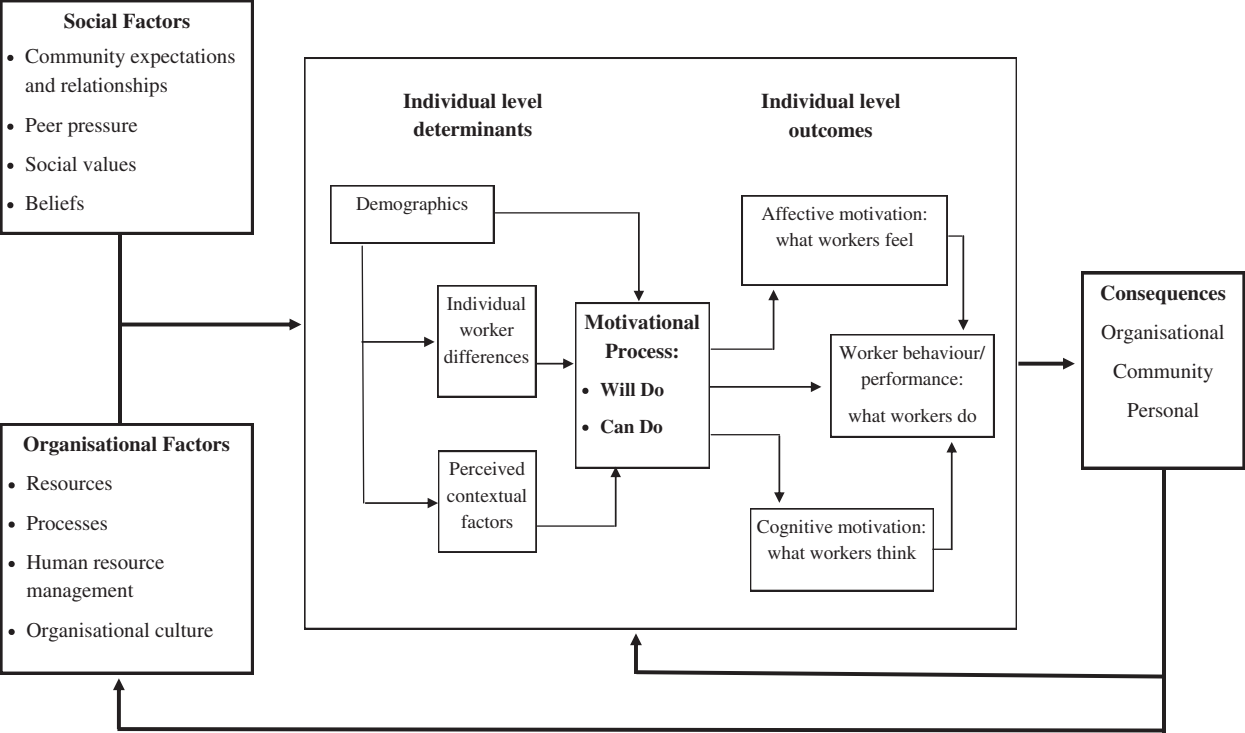

Supplement: MOESM1 [file 9569998]
